# Supplementary material for: Multi-level chiral edge states in Janus M2XS2Se2 (M = V, Ti; X = W, Mo) monolayers with high Curie temperature and sizable nontrivial topological gaps
Source: Royal Society of Chemistry journal article supplement (doi:10.1039/d4cp03325f), 2024-01-01
Supplement: d4cp03325f1.pdf [file d4cp03325f1.pdf]

## Supplementary materials

Multi-level chiral edge states in Janus  $M_2XS_2Se_2$  ( $M = V, Ti$ ;  $X = W, Mo$ ) monolayers with high Curie temperature and sizable nontrivial topological gaps

Li Deng<sup>a</sup>, Xiang Yin<sup>a</sup>, Yanzhao Wu<sup>a</sup>, Junwei Tong<sup>b</sup>, Gaowu Qin<sup>a</sup> and Xianmin Zhang<sup>a\*</sup>

<sup>a</sup>Key Laboratory for Anisotropy and Texture of Materials (Ministry of Education), School of Material Science and Engineering, Northeastern University, Shenyang, 110819, China

<sup>b</sup>Department of Physics, Freie Universität Berlin, Berlin, 14195, Germany

Using  $Ti_2WS_2Se_2$  monolayer as an example, the convergence tests of k-points and cutoff energy are conducted, as shown in Figure S1. It can be found that as the k-points and cutoff energy reaching  $15 \times 15 \times 1$  and 500 eV, the energy of  $Ti_2WS_2Se_2$  monolayer become the lowest and stable. Therefore, the k-points and cutoff energy are set as  $15 \times 15 \times 1$  and 500 eV, respectively.

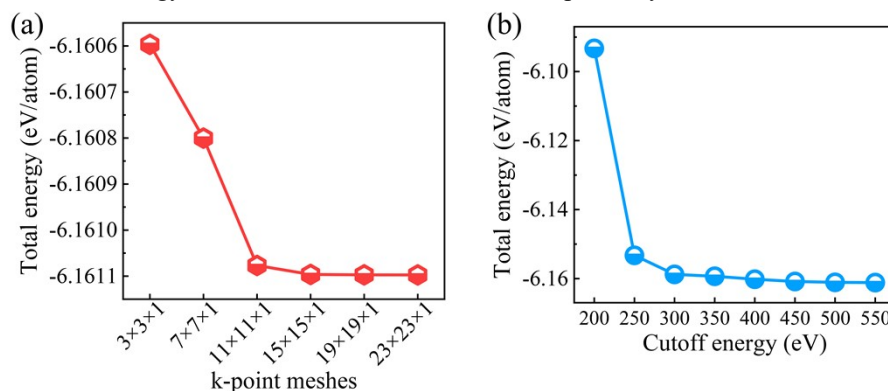

**Figure S1.** Convergence tests of (a) k-points and (b) cutoff energy for the  $Ti_2WS_2Se_2$  monolayer.

**Table S1.** Lattice constant  $a$ , bond length  $d$ , monolayer thickness  $h$ , cohesive energy  $E_{coh}$ , and formation energy  $E_{form}$  of the  $M_2XS_2Se_2$  ( $M = V, Ti$ ;  $X = W, Mo$ ) monolayers.

| System         | $a$ (Å) | $d_{M-S}$ (Å) | $d_{M-Se}$ (Å) | $d_{X-S}$ (Å) | $d_{X-Se}$ (Å) | $h$ (Å) | $E_{coh}$ (eV/atom) | $E_{form}$ (eV/atom) |
|----------------|---------|---------------|----------------|---------------|----------------|---------|---------------------|----------------------|
| $V_2WS_2Se_2$  | 5.83    | 2.42          | 2.55           | 2.30          | 2.45           | 2.74    | 4.93                | -0.65                |
| $V_2MoS_2Se_2$ | 5.82    | 2.40          | 2.53           | 2.32          | 2.46           | 2.71    | 3.56                | -0.71                |
| $Ti_2WS_2Se_2$ | 5.79    | 2.44          | 2.57           | 2.33          | 2.48           | 2.88    | 4.98                | -0.67                |
| $Ti_2MoS_2Se$  | 5.80    | 2.42          | 2.55           | 2.37          | 2.50           | 2.80    | 4.63                | —                    |

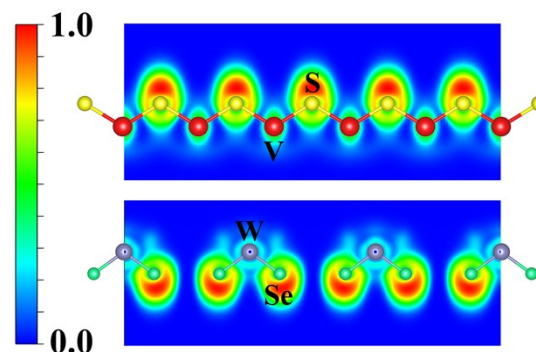

**Figure S2.** Electron localization function of  $V_2WS_2Se_2$  monolayer in the  $(110)$  plane along V-S (upper)

and W-Se (lower) bonds.

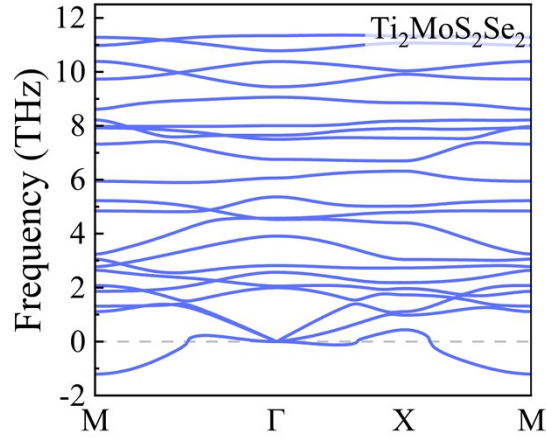

**Figure S3.** Phonon spectrum of the  $\text{Ti}_2\text{MoS}_2\text{Se}_2$  monolayer.

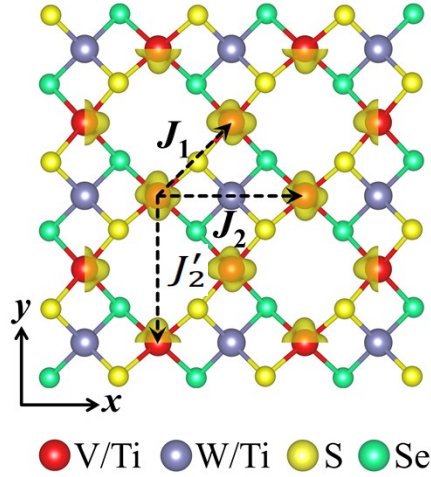

**Figure S4.** Spin density distribution of FM configuration and schematic of exchange parameters ( $J_1, J_2$  and  $J_2'$ ) for the  $\text{M}_2\text{XS}_2\text{Se}_2$  ( $\text{M} = \text{V}, \text{Ti}; \text{X} = \text{W}, \text{Mo}$ ) monolayers. Yellow iso-surfaces ( $0.03 \text{ e}/\text{bohr}^3$ ) represent the spin-up densities.

**Table S2.** Exchange energy ( $\Delta E_{ex} = E_{AFM1/AFM2/AFM3} - E_{FM}$ ) of the  $\text{V}_2\text{WS}_2\text{Se}_2$ ,  $\text{V}_2\text{MoS}_2\text{Se}_2$ , and  $\text{Ti}_2\text{WS}_2\text{Se}_2$  monolayers.

| System                              | $E_{AMF1} - E_{FM}$<br>(meV/2 × 2 supercell) | $E_{AMF2} - E_{FM}$<br>(meV/2 × 2 supercell) | $E_{AMF3} - E_{FM}$<br>(meV/2 × 2 supercell) |
|-------------------------------------|----------------------------------------------|----------------------------------------------|----------------------------------------------|
| $\text{V}_2\text{WS}_2\text{Se}_2$  | 1889.58                                      | 1853.46                                      | 1746.06                                      |
| $\text{V}_2\text{MoS}_2\text{Se}_2$ | 2657.58                                      | 2087.37                                      | 2167.10                                      |
| $\text{Ti}_2\text{WS}_2\text{Se}_2$ | 653.68                                       | 752.97                                       | 830.93                                       |

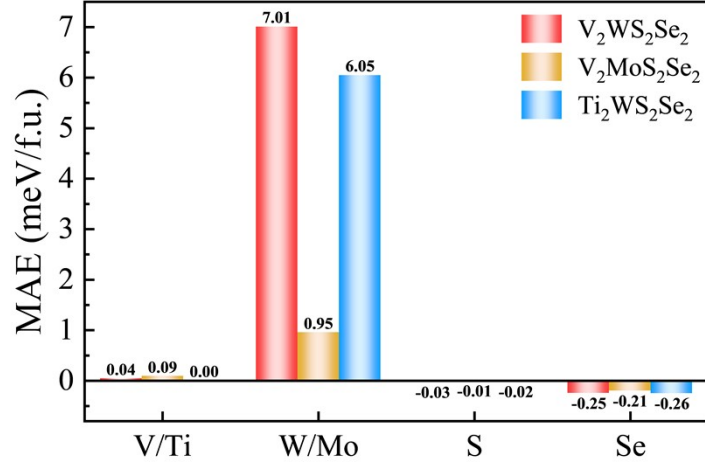

**Figure S5.** Atom-resolved MAE of the  $V_2WS_2Se_2$ ,  $V_2MoS_2Se_2$ , and  $Ti_2WS_2Se_2$  monolayers.

**Table S3.** Exchange parameters of the  $V_2WS_2Se_2$ ,  $V_2MoS_2Se_2$ , and  $Ti_2WS_2Se_2$  monolayers.

| System         | $J_1$ (meV) | $J_2$ (meV) | $J_3$ (meV) |
|----------------|-------------|-------------|-------------|
| $V_2WS_2Se_2$  | 26.20       | 22.30       | 2.98        |
| $V_2MoS_2Se_2$ | 36.91       | 23.29       | -2.21       |
| $Ti_2WS_2Se_2$ | 20.43       | 26.63       | 4.87        |

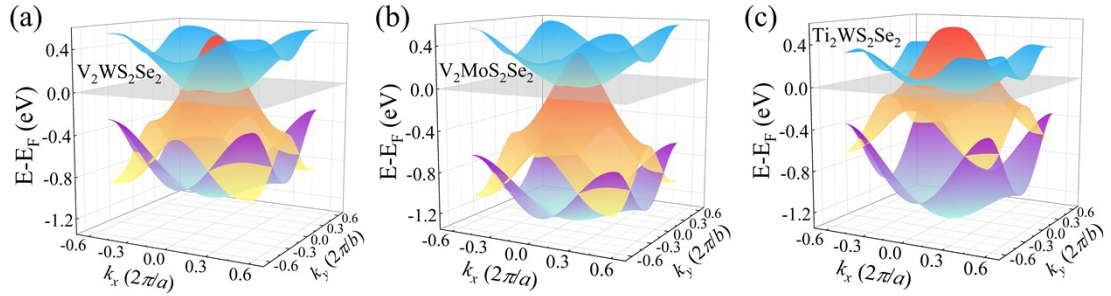

**Figure S6.** Three-dimensional band structures of the (a)  $V_2WS_2Se_2$ , (b)  $V_2MoS_2Se_2$ , and (c)  $Ti_2WS_2Se_2$  monolayers without considering the SOC effect (only the bands related to band inversion are shown here).

Red, blue, and purple bands represent the V/Ti- $d_{xz}, d_{yz}$  spin-up band, W/Mo- $d_{z^2}$  spin-down band, and W/Mo- $d_{x^2-y^2}$  spin-down band, respectively.

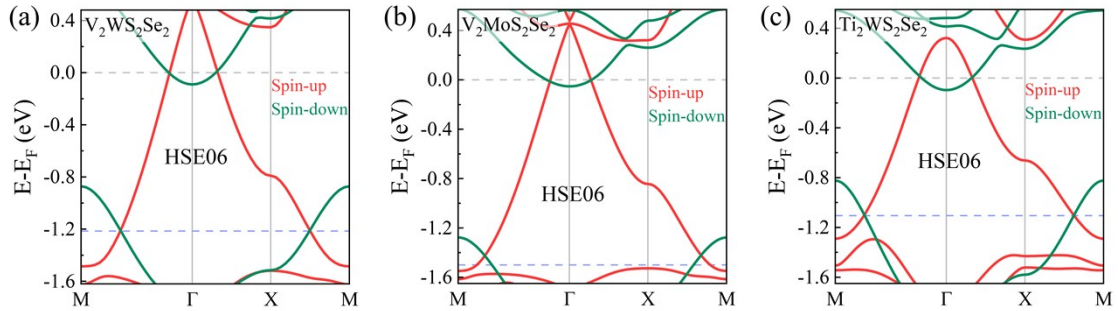

**Figure S7.** Spin-resolved band structures of (a)  $V_2WS_2Se_2$ , (b)  $V_2MoS_2Se_2$ , and (c)  $Ti_2WS_2Se_2$

monolayers without considering the SOC effect from HSE06 method.

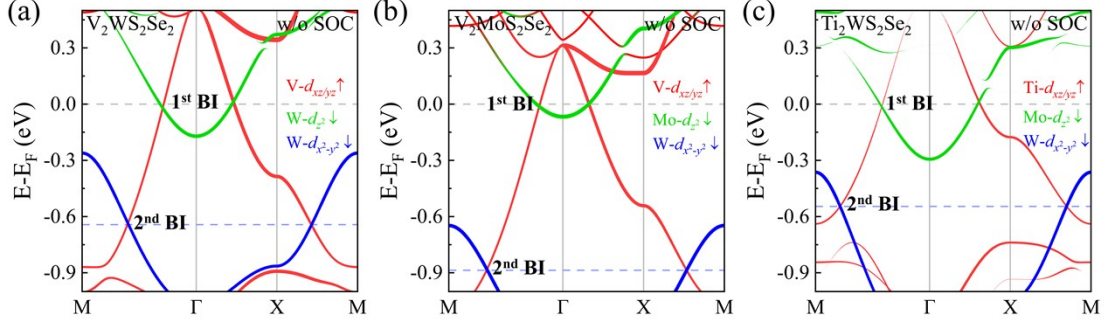

**Figure S8.** Orbital-resolved energy bands of the (a)  $V_2WS_2Se_2$ , (b)  $V_2MoS_2Se_2$ , and (c)  $Ti_2WS_2Se_2$  monolayers with considering the SOC effect (only the bands related to band inversion are shown here).

|                    |                     |                    |                     |                    |                     |                    |                      |
|--------------------|---------------------|--------------------|---------------------|--------------------|---------------------|--------------------|----------------------|
| (a) $V_2WS_2Se_2$  |                     |                    |                     | (b) $V_2MoS_2Se_2$ |                     |                    |                      |
| 1.0000000000000000 |                     |                    |                     | 1.0000000000000000 |                     |                    |                      |
| 5.8328520454112338 | 0.0000000000000000  | 0.0000000000000000 | 0.0000000000000000  | 5.8200015183163414 | 0.0000000000000000  | 0.0000000000000000 | 0.0000000000000000   |
| 0.0000000000000000 | 5.8328520454112338  | 0.0000000000000000 | 0.0000000000000000  | 0.0000000000000000 | 5.8200015183163414  | 0.0000000000000000 | 0.0000000000000000   |
| 0.0000000000000000 | 0.0000000000000000  | 0.0000000000000000 | 22.7435172951562379 | 0.0000000000000000 | 0.0000000000000000  | 0.0000000000000000 | 22.71117276183695260 |
| V                  | W                   | S                  | Se                  | V                  | Mo                  | S                  | Se                   |
| 2                  | 1                   | 2                  | 2                   | 2                  | 1                   | 2                  | 2                    |
| Direct             |                     |                    |                     | Direct             |                     |                    |                      |
| 0.0000000000000000 | 0.5000000000554152  | 0.5052295399110873 |                     | 0.0000000000000000 | 0.5000000000554152  | 0.5052504299380516 |                      |
| 0.5000000000554152 | -0.0000000000000000 | 0.5052295399110873 |                     | 0.5000000000554152 | 0.0000000000000000  | 0.5052504299380516 |                      |
| 0.0000000000000000 | -0.0000000000000000 | 0.5029590849258385 |                     | 0.0000000000000000 | 0.0000000000000000  | 0.5033008025619665 |                      |
| 0.2299054517316166 | 0.7700945631556890  | 0.5603262536924473 |                     | 0.2345206149556347 | 0.7654793999316709  | 0.5596988407032555 |                      |
| 0.7700945631556890 | 0.2299054517316166  | 0.5603262536924473 |                     | 0.7654793999316709 | 0.2345206149556347  | 0.5596988407032555 |                      |
| 0.7602784148964239 | 0.7602784148964239  | 0.4396986381781852 |                     | 0.7570774989561642 | 0.7570774989561642  | 0.4403011592967445 |                      |
| 0.2397215999908816 | 0.2397215999908816  | 0.4396986381781852 |                     | 0.2429225159311414 | 0.2429225159311414  | 0.4403011592967445 |                      |
| Ti                 | W                   | S                  | Se                  | Ti                 | Mo                  | S                  | Se                   |
| 2                  | 1                   | 2                  | 2                   | 2                  | 1                   | 2                  | 2                    |
| Direct             |                     |                    |                     | Direct             |                     |                    |                      |
| 0.0000000000000000 | 0.5000000000554152  | 0.5049520618571475 |                     | 0.0000000000000000 | 0.5000000000554152  | 0.5070682652818640 |                      |
| 0.5000000000554152 | 0.0000000000000000  | 0.5049520618571475 |                     | 0.5000000000554152 | -0.0000000000000000 | 0.5070682652818640 |                      |
| 0.0000000000000000 | 0.0000000000000000  | 0.5029973098444525 |                     | 0.0000000000000000 | -0.0000000000000000 | 0.5030021382261209 |                      |
| 0.2308900277787500 | 0.7691099871085558  | 0.5628779279693135 |                     | 0.2382580206908854 | 0.7617419941964202  | 0.5791030809674473 |                      |
| 0.7691099871085558 | 0.2308900277787500  | 0.5628779279693135 |                     | 0.7617419941964202 | 0.2382580206908854  | 0.5791030809674473 |                      |
| 0.7596729125889323 | 0.7596729125889323  | 0.4370703885543428 |                     | 0.7509354302865990 | 0.7509354302865990  | 0.4211765124420752 |                      |
| 0.2403271022983732 | 0.2403271022983732  | 0.4370703885543428 |                     | 0.2490645846007066 | 0.2490645846007066  | 0.4211765124420752 |                      |

**Figure S9.** The geometry of optimized structures for the (a)  $V_2WS_2Se_2$ , (b)  $V_2MoS_2Se_2$ , (c)  $Ti_2WS_2Se_2$ , and (d)  $Ti_2MoS_2Se_2$  monolayers.
